# Supplementary material for: The Epidemiology of Palmoplantar Pustulosis: An Analysis of Multiple Health Insurance Claims and Electronic Health Records Databases
Source: Springer Nature journal article supplement (doi:10.1007/s12325-023-02669-w), 2023-09-22
Supplement: MOESM1 [file 26076992]

## Supplementary Material

### The Epidemiology of Palmoplantar Pustulosis: An Analysis of Multiple Health Insurance Claims and Electronic Health Records Databases

**Supplementary Information Table 1. Prevalence per 100,000 population using the specific PPP definition by database, year, and sex (all ages)**

|                   | Database  | Year              | Males               | Females                | Overall             |
|-------------------|-----------|-------------------|---------------------|------------------------|---------------------|
| <b>Japan</b>      | JMDC      | 2016              | 46.65 (44.25–49.14) | 58.83 (55.86–61.92)    | 52.14 (50.26–54.09) |
|                   |           | 2017              | 51.91 (49.58–54.33) | 68.00 (65.10–71.00)    | 59.30 (57.46–61.19) |
|                   |           | 2018              | 59.24 (56.87–61.67) | 81.66 (78.62–84.78)    | 69.46 (67.56–71.39) |
|                   |           | 2019              | 67.38 (64.93–69.90) | 94.57 (91.40–97.81)    | 79.81 (77.84–81.81) |
|                   |           | 2020              | 75.57 (73.01–78.21) | 105.36 (102.09–108.71) | 89.35 (87.29–91.44) |
| <b>US</b>         | Optum EHR | 2016              | 1.12 (0.97–1.29)    | 2.67 (2.46–2.89)       | 1.99 (1.86–2.13)    |
|                   |           | 2017              | 1.63 (1.44–1.84)    | 4.20 (3.93–4.48)       | 3.08 (2.91–3.26)    |
|                   |           | 2018              | 2.49 (2.23–2.76)    | 6.24 (5.88–6.61)       | 4.60 (4.37–4.84)    |
|                   |           | 2019              | 3.31 (2.99–3.65)    | 8.19 (7.75–8.65)       | 6.08 (5.79–6.38)    |
|                   |           | 2020              | 4.76 (4.29–5.27)    | 11.58 (10.95–12.25)    | 8.68 (8.26–9.12)    |
|                   | Optum SES | 2016              | 1.63 (1.35–1.95)    | 3.45 (3.05–3.89)       | 2.56 (2.32–2.83)    |
|                   |           | 2017              | 2.30 (1.98–2.66)    | 5.56 (5.07–6.09)       | 3.98 (3.68–4.29)    |
|                   |           | 2018              | 2.92 (2.56–3.31)    | 7.05 (6.50–7.63)       | 5.04 (4.70–5.39)    |
|                   |           | 2019              | 3.63 (3.23–4.07)    | 8.88 (8.27–9.53)       | 6.34 (5.96–6.73)    |
|                   |           | 2020              | 4.20 (3.76–4.68)    | 10.41 (9.74–11.12)     | 7.43 (7.01–7.86)    |
|                   | CCAE      | 2016              | 1.79 (1.55–2.06)    | 4.59 (4.21–5.00)       | 3.24 (3.01–3.49)    |
|                   |           | 2017              | 2.61 (2.30–2.94)    | 6.05 (5.60–6.53)       | 4.39 (4.11–4.68)    |
|                   |           | 2018              | 2.93 (2.61–3.27)    | 6.78 (6.31–7.29)       | 4.90 (4.61–5.21)    |
|                   |           | 2019              | 3.49 (3.13–3.88)    | 8.38 (7.83–8.96)       | 5.99 (5.66–6.34)    |
|                   |           | 2020              | 3.76 (3.38–4.18)    | 8.93 (8.35–9.55)       | 6.41 (6.05–6.78)    |
|                   | MDCD      | 2016              | 0.84 (0.60–1.13)    | 2.39 (2.03–2.80)       | 1.72 (1.49–1.98)    |
|                   |           | 2017              | 1.40 (1.09–1.77)    | 4.04 (3.57–4.56)       | 2.90 (2.60–3.23)    |
|                   |           | 2018              | 1.88 (1.49–2.34)    | 5.68 (5.07–6.34)       | 4.04 (3.66–4.46)    |
|                   |           | 2019              | 2.04 (1.65–2.49)    | 6.04 (5.44–6.68)       | 4.30 (3.92–4.71)    |
|                   |           | 2020              | 2.16 (1.77–2.61)    | 6.13 (5.54–6.77)       | 4.40 (4.02–4.81)    |
| MDCR <sup>a</sup> | 2016      | 5.11 (3.68–6.90)  | 7.96 (6.32–9.89)    | 6.68 (5.56–7.98)       |                     |
|                   | 2017      | 8.03 (5.90–10.68) | 11.61 (9.24–14.41)  | 9.99 (8.34–11.87)      |                     |
|                   | 2018      | 7.28 (5.01–10.22) | 10.39 (7.91–13.40)  | 9.01 (7.26–11.05)      |                     |
|                   | 2019      | 8.04 (5.50–11.35) | 14.56 (11.41–18.30) | 11.67 (9.55–14.13)     |                     |
|                   | 2020      | 4.46 (2.89–6.59)  | 11.27 (8.88–14.11)  | 8.18 (6.66–9.94)       |                     |

<sup>a</sup>Medicare eligibility is mostly restricted to adults ≥65 years of age.

PPP=palmoplantar pustulosis; JMDC=Japan Medical Data Center; EHR=Optum® de-identified Electronic Health Record Database; SES=Optum's Clinformatics® de-identified Data Mart Database; CCAE=IBM®MarketScan® Commercial Database; MDCD=IBM®MarketScan® Multi-State Medicaid Database; MDCR=IBM®MarketScan® Medicare Supplemental Database.

**Supplementary Information Table 2. Prevalence per 100,000 population using the specific PPP definition among patients  $\leq 2$  years of age by database, year, and sex**

|              | Database  | Year | Males            | Females          | Overall          |
|--------------|-----------|------|------------------|------------------|------------------|
| <b>Japan</b> | JMDC      | 2016 | 0                | 2.21 (0.27–7.99) | 1.08 (0.13–3.89) |
|              |           | 2017 | 1.80 (0.22–6.50) | 0.95 (0.02–5.31) | 1.39 (0.29–4.06) |
|              |           | 2018 | 3.31 (0.90–8.48) | 2.62 (0.54–7.65) | 2.97 (1.20–6.13) |
|              |           | 2019 | 2.45 (0.51–7.16) | 3.43 (0.93–8.77) | 2.93 (1.18–6.03) |
|              |           | 2020 | 1.65 (0.20–5.98) | 3.46 (0.94–8.85) | 2.54 (0.93–5.52) |
| <b>US</b>    | Optum EHR | 2016 | 0.36 (0.04–1.29) | 0.39 (0.05–1.41) | 0.37 (0.10–0.96) |
|              |           | 2017 | 0.39 (0.05–1.41) | 0                | 0.20 (0.02–0.74) |
|              |           | 2018 | 0.50 (0.06–1.81) | 0                | 0.26 (0.03–0.95) |
|              |           | 2019 | 1.14 (0.31–2.92) | 0                | 0.60 (0.16–1.53) |
|              |           | 2020 | 1.35 (0.28–3.95) | 0                | 0.70 (0.15–2.06) |
|              | Optum SES | 2016 | 0                | 0                | 0                |
|              |           | 2017 | 0.64 (0.02–3.56) | 0                | 0.33 (0.01–1.83) |
|              |           | 2018 | 0                | 0                | 0                |
|              |           | 2019 | 0                | 0                | 0                |
|              |           | 2020 | 0.76 (0.02–4.23) | 0                | 0.39 (0.01–2.17) |
|              | CCAIE     | 2016 | 0.33 (0.01–1.84) | 0.35 (0.01–1.93) | 0.34 (0.04–1.22) |
|              |           | 2017 | 0.35 (0.01–1.93) | 0.73 (0.09–2.64) | 0.53 (0.11–1.56) |
|              |           | 2018 | 0.69 (0.08–2.51) | 0                | 0.36 (0.04–1.28) |
|              |           | 2019 | 0.38 (0.01–2.11) | 0.39 (0.01–2.20) | 0.39 (0.05–1.39) |
|              |           | 2020 | 0                | 0                | 0                |
|              | MDCD      | 2016 | 0.46 (0.06–1.66) | 0.97 (0.26–2.47) | 0.71 (0.26–1.54) |
|              |           | 2017 | 0.23 (0.01–1.29) | 0.49 (0.06–1.76) | 0.36 (0.07–1.04) |
|              |           | 2018 | 0.56 (0.07–2.01) | 0.29 (0.01–1.64) | 0.43 (0.09–1.26) |
|              |           | 2019 | 1.05 (0.29–2.70) | 0                | 0.54 (0.15–1.38) |
|              |           | 2020 | 1.33 (0.43–3.11) | 0.28 (0.01–1.56) | 0.82 (0.30–1.78) |

PPP=palmoplantar pustulosis; JMDC=Japan Medical Data Center; EHR=Optum® de-identified Electronic Health Record Database; SES=Optum’s Clinformatics® de-identified Data Mart Database; CCAIE=IBM® MarketScan® Commercial Database; MDCD=IBM®MarketScan® Multi-State Medicaid Database; MDCR=IBM® MarketScan® Medicare Supplemental Database.

**Supplementary Information Table 3. Prevalence per 100,000 population using the specific PPP definition among patients ≤11 year of age by database, year, and sex**

|              | Database  | Year | Males               | Females             | Overall             |
|--------------|-----------|------|---------------------|---------------------|---------------------|
| <b>Japan</b> | JMDC      | 2016 | 9.29 (6.64–12.66)   | 6.37 (4.16–9.34)    | 7.87 (6.09–10.02)   |
|              |           | 2017 | 10.50 (7.87–13.74)  | 8.79 (6.33–11.88)   | 9.67 (7.82–11.82)   |
|              |           | 2018 | 10.70 (8.17–13.78)  | 12.61 (9.77–16.01)  | 11.63 (9.69–13.84)  |
|              |           | 2019 | 12.16 (9.49–15.33)  | 12.27 (9.53–15.56)  | 12.21 (10.27–14.42) |
|              |           | 2020 | 13.88 (11.04–17.23) | 15.16 (12.11–18.75) | 14.51 (12.39–16.88) |
| <b>US</b>    | Optum EHR | 2016 | 0.36 (0.17–0.69)    | 0.26 (0.10–0.57)    | 0.31 (0.18–0.52)    |
|              |           | 2017 | 0.53 (0.27–0.93)    | 0.43 (0.20–0.82)    | 0.48 (0.30–0.74)    |
|              |           | 2018 | 0.68 (0.35–1.18)    | 0.55 (0.25–1.04)    | 0.62 (0.38–0.94)    |
|              |           | 2019 | 1.16 (0.68–1.86)    | 0.52 (0.21–1.07)    | 0.85 (0.55–1.27)    |
|              |           | 2020 | 1.76 (0.98–2.90)    | 0.76 (0.28–1.66)    | 1.28 (0.79–1.96)    |
|              | Optum SES | 2016 | 0.13 (0.00–0.73)    | 0.14 (0.00–0.76)    | 0.13 (0.02–0.48)    |
|              |           | 2017 | 0.13 (0.00–0.70)    | 0.13 (0.00–0.74)    | 0.13 (0.02–0.47)    |
|              |           | 2018 | 0.13 (0.00–0.72)    | 0.14 (0.00–0.76)    | 0.13 (0.02–0.48)    |
|              |           | 2019 | 0.54 (0.15–1.38)    | 0.42 (0.09–1.24)    | 0.48 (0.19–1.00)    |
|              |           | 2020 | 0.74 (0.24–1.73)    | 0.16 (0.00–0.87)    | 0.46 (0.17–0.99)    |
|              | CCAE      | 2016 | 0.38 (0.14–0.83)    | 0.40 (0.15–0.86)    | 0.39 (0.20–0.68)    |
|              |           | 2017 | 0.47 (0.19–0.96)    | 0.56 (0.24–1.10)    | 0.51 (0.29–0.84)    |
|              |           | 2018 | 0.60 (0.28–1.14)    | 0.42 (0.15–0.91)    | 0.51 (0.29–0.85)    |
|              |           | 2019 | 0.65 (0.30–1.23)    | 0.60 (0.26–1.19)    | 0.63 (0.37–1.00)    |
|              |           | 2020 | 0.61 (0.26–1.21)    | 0.32 (0.09–0.82)    | 0.47 (0.24–0.82)    |
|              | MDCD      | 2016 | 0.15 (0.03–0.45)    | 0.38 (0.15–0.78)    | 0.26 (0.13–0.49)    |
|              |           | 2017 | 0.26 (0.08–0.60)    | 0.60 (0.30–1.07)    | 0.42 (0.24–0.69)    |
|              |           | 2018 | 0.19 (0.04–0.54)    | 0.73 (0.36–1.30)    | 0.45 (0.25–0.75)    |
|              |           | 2019 | 0.29 (0.09–0.67)    | 0.92 (0.51–1.51)    | 0.59 (0.36–0.92)    |
|              |           | 2020 | 0.41 (0.16–0.83)    | 0.74 (0.38–1.29)    | 0.57 (0.34–0.88)    |

PPP=palmoplantar pustulosis; JMDC=Japan Medical Data Center; EHR=Optum® de-identified Electronic Health Record Database; SES=Optum’s Clinformatics® de-identified Data Mart Database; CCAE=IBM® MarketScan® Commercial Database; MDCD=IBM® MarketScan® Multi-State Medicaid Database; MDCR=IBM® MarketScan® Medicare Supplemental Database.

**Supplementary Information Table 4. Prevalence per 100,000 population using the specific PPP definition among patients 12–17 years of age by database, year, and sex**

|              | Database  | Year | Males               | Females             | Overall             |
|--------------|-----------|------|---------------------|---------------------|---------------------|
| <b>Japan</b> | JMDC      | 2016 | 13.22 (8.92–18.87)  | 13.89 (9.37–19.83)  | 13.55 (10.34–17.44) |
|              |           | 2017 | 16.92 (12.34–22.64) | 18.19 (13.32–24.26) | 17.54 (14.12–21.53) |
|              |           | 2018 | 21.39 (16.44–27.37) | 19.98 (15.09–25.94) | 20.70 (17.15–24.77) |
|              |           | 2019 | 26.09 (20.72–32.43) | 25.42 (20.00–31.86) | 25.77 (21.88–30.14) |
|              |           | 2020 | 27.54 (22.06–33.97) | 26.94 (21.40–33.49) | 27.25 (23.29–31.70) |
| <b>US</b>    | Optum EHR | 2016 | 0                   | 0.59 (0.26–1.16)    | 0.30 (0.13–0.59)    |
|              |           | 2017 | 0.17 (0.02–0.60)    | 1.12 (0.61–1.89)    | 0.66 (0.37–1.06)    |
|              |           | 2018 | 0.31 (0.06–0.91)    | 1.49 (0.84–2.46)    | 0.91 (0.54–1.44)    |
|              |           | 2019 | 0.63 (0.20–1.47)    | 1.93 (1.11–3.14)    | 1.29 (0.80–1.98)    |
|              |           | 2020 | 1.92 (0.88–3.64)    | 2.80 (1.53–4.70)    | 2.37 (1.51–3.56)    |
|              | Optum SES | 2016 | 0                   | 0.46 (0.06–1.67)    | 0.23 (0.03–0.82)    |
|              |           | 2017 | 0.21 (0.01–1.19)    | 0.88 (0.24–2.26)    | 0.54 (0.18–1.26)    |
|              |           | 2018 | 0.44 (0.05–1.58)    | 0.68 (0.14–1.99)    | 0.56 (0.18–1.30)    |
|              |           | 2019 | 1.13 (0.37–2.63)    | 0.94 (0.26–2.40)    | 1.03 (0.47–1.96)    |
|              |           | 2020 | 1.22 (0.40–2.85)    | 2.03 (0.88–4.00)    | 1.62 (0.86–2.77)    |
|              | CCAIE     | 2016 | 0.40 (0.11–1.01)    | 0.21 (0.02–0.74)    | 0.30 (0.11–0.66)    |
|              |           | 2017 | 0.84 (0.36–1.65)    | 0.43 (0.12–1.11)    | 0.64 (0.33–1.11)    |
|              |           | 2018 | 0.73 (0.29–1.51)    | 0.98 (0.45–1.86)    | 0.85 (0.49–1.39)    |
|              |           | 2019 | 0.67 (0.25–1.46)    | 1.51 (0.80–2.58)    | 1.08 (0.65–1.69)    |
|              |           | 2020 | 0.71 (0.26–1.54)    | 0.86 (0.34–1.77)    | 0.78 (0.42–1.34)    |
|              | MDCD      | 2016 | 0.11 (0.00–0.64)    | 0.24 (0.03–0.88)    | 0.18 (0.04–0.51)    |
|              |           | 2017 | 0.45 (0.12–1.16)    | 0.72 (0.26–1.57)    | 0.58 (0.28–1.07)    |
|              |           | 2018 | 0.53 (0.15–1.37)    | 0.71 (0.23–1.66)    | 0.62 (0.28–1.17)    |
|              |           | 2019 | 0.84 (0.34–1.73)    | 0.64 (0.21–1.49)    | 0.74 (0.38–1.30)    |
|              |           | 2020 | 1.16 (0.56–2.13)    | 0.86 (0.35–1.77)    | 1.01 (0.59–1.62)    |

PPP=palmoplantar pustulosis; JMDC=Japan Medical Data Center; EHR=Optum® de-identified Electronic Health Record Database; SES=Optum’s Clinformatics® de-identified Data Mart Database; CCAIE=IBM® MarketScan® Commercial Database; MDCD=IBM® MarketScan® Multi-State Medicaid Database; MDCR=IBM® MarketScan® Medicare Supplemental Database.

**Supplementary Information Table 5. Prevalence per 100,000 population using the specific PPP definition among adults  $\geq 18$  years of age by database, year, and sex**

|              | Database  | Year | Males               | Females                | Overall                |
|--------------|-----------|------|---------------------|------------------------|------------------------|
| <b>Japan</b> | JMDC      | 2016 | 56.63 (53.64–59.74) | 75.52 (71.62–79.57)    | 64.95 (62.54–67.42)    |
|              |           | 2017 | 62.70 (59.80–65.71) | 85.76 (82.02–89.62)    | 73.11 (70.78–75.49)    |
|              |           | 2018 | 71.46 (68.53–74.48) | 102.97 (99.06–107.00)  | 85.54 (83.15–87.98)    |
|              |           | 2019 | 80.88 (77.86–83.98) | 118.87 (114.81–123.04) | 97.92 (95.44–100.44)   |
|              |           | 2020 | 90.67 (87.51–93.92) | 131.31 (127.14–135.58) | 109.18 (106.61–111.79) |
| <b>US</b>    | Optum EHR | 2016 | 1.35 (1.17–1.56)    | 3.10 (2.85–3.35)       | 2.36 (2.20–2.53)       |
|              |           | 2017 | 1.95 (1.72–2.20)    | 4.84 (4.53–5.17)       | 3.62 (3.41–3.84)       |
|              |           | 2018 | 2.95 (2.65–3.29)    | 7.14 (6.73–7.57)       | 5.38 (5.10–5.66)       |
|              |           | 2019 | 3.85 (3.47–4.26)    | 9.33 (8.83–9.86)       | 7.04 (6.70–7.39)       |
|              |           | 2020 | 5.35 (4.81–5.94)    | 12.95 (12.24–13.70)    | 9.82 (9.34–10.32)      |
|              | Optum SES | 2016 | 1.93 (1.60–2.31)    | 4.00 (3.54–4.51)       | 3.00 (2.71–3.32)       |
|              |           | 2017 | 2.70 (2.32–3.12)    | 6.41 (5.84–7.02)       | 4.62 (4.27–4.99)       |
|              |           | 2018 | 3.39 (2.97–3.85)    | 8.11 (7.47–8.78)       | 5.83 (5.44–6.24)       |
|              |           | 2019 | 4.12 (3.66–4.62)    | 10.12 (9.41–10.86)     | 7.24 (6.81–7.69)       |
|              |           | 2020 | 4.72 (4.22–5.27)    | 11.74 (10.97–12.54)    | 8.40 (7.93–8.89)       |
|              | CCAЕ      | 2016 | 2.23 (1.92–2.58)    | 5.75 (5.27–6.27)       | 4.08 (3.79–4.40)       |
|              |           | 2017 | 3.23 (2.85–3.65)    | 7.57 (7.00–8.17)       | 5.50 (5.15–5.87)       |
|              |           | 2018 | 3.62 (3.21–4.06)    | 8.44 (7.84–9.07)       | 6.12 (5.75–6.51)       |
|              |           | 2019 | 4.35 (3.89–4.85)    | 10.39 (9.70–11.12)     | 7.48 (7.06–7.93)       |
|              |           | 2020 | 4.71 (4.22–5.25)    | 11.21 (10.47–11.99)    | 8.08 (7.63–8.56)       |
|              | MDCD      | 2016 | 1.78 (1.25–2.46)    | 3.83 (3.23–4.50)       | 3.11 (2.67–3.59)       |
|              |           | 2017 | 2.82 (2.16–3.62)    | 6.37 (5.60–7.22)       | 5.10 (4.55–5.70)       |
|              |           | 2018 | 3.86 (3.03–4.86)    | 8.91 (7.94–9.97)       | 7.11 (6.41–7.86)       |
|              |           | 2019 | 3.89 (3.10–4.80)    | 9.38 (8.43–10.41)      | 7.36 (6.69–8.08)       |
|              |           | 2020 | 3.83 (3.07–4.71)    | 9.46 (8.52–10.47)      | 7.37 (6.71–8.07)       |

PPP=palmoplantar pustulosis; JMDC=Japan Medical Data Center; EHR=Optum® de-identified Electronic Health Record Database; SES=Optum’s Clinformatics® de-identified Data Mart Database; CCAE=IBM® MarketScan® Commercial Database; MDCD=IBM® MarketScan® Multi-State Medicaid Database; MDCR=IBM® MarketScan® Medicare Supplemental Database.

**Supplementary Information Table 6. Baseline medical history of PPP patients identified using the specific PPP definition**

|                                                    | Japan     | US        |           |           |         |         |
|----------------------------------------------------|-----------|-----------|-----------|-----------|---------|---------|
|                                                    | JMDC      | Optum EHR | Optum SES | CCAIE     | MDCD    | MDCR    |
|                                                    | (n=6,376) | (n=1,848) | (n=1,563) | (n=1,838) | (n=578) | (n=195) |
| <b>History of cardiovascular disease</b>           |           |           |           |           |         |         |
| Atrial fibrillation                                | 0.2%      | 3.1%      | 5.5%      | 1.4%      | 2.9%    | 8.7%    |
| Cerebrovascular disease                            | 2.2%      | 2.5%      | 5.1%      | 2.5%      | 2.8%    | 7.7%    |
| Coronary arteriosclerosis                          | <0.1%     | 5.3%      | 11.1%     | 4.1%      | 6.4%    | 16.9%   |
| Heart disease                                      | 8.2%      | 15.2%     | 23.9%     | 12.1%     | 18.7%   | 38.0%   |
| Heart failure                                      | 2.7%      | 2.9%      | 5.6%      | 1.1%      | 5.5%    | 5.6%    |
| Ischemic heart disease                             | 3.0%      | 2.7%      | 5.9%      | 2.0%      | 3.3%    | 6.2%    |
| Peripheral vascular disease                        | 1.3%      | 3.1%      | 10.0%     | 2.2%      | 6.4%    | 10.3%   |
| Pulmonary embolism                                 | <0.1%     | 0.5%      | 0.6%      | <0.3%     | 1.4%    | <2.6%   |
| Venous thrombosis                                  | 0.7%      | 1.2%      | 1.9%      | 1.0%      | 1.6%    | <2.6%   |
| <b>Medication use</b>                              |           |           |           |           |         |         |
| Agents acting on the renin-angiotensin system      | 10.1%     | 24.0%     | 33.6%     | 24.9%     | 19.6%   | 42.0%   |
| Antibacterials for systemic use                    | 68.6%     | 45.8%     | 61.6%     | 65.0%     | 65.0%   | 71.3%   |
| Antidepressants                                    | 4.0%      | 28.4%     | 30.0%     | 29.9%     | 39.5%   | 29.2%   |
| Antiinflammatory and antirheumatic products        | 28.0%     | 45.8%     | 28.9%     | 33.7%     | 50.5%   | 34.9%   |
| Antimalarials                                      | <0.1%     | 2.6%      | 2.1%      | 2.2%      | 2.2%    | <2.6%   |
| Antipsoriatics                                     | 6.7%      | 13.9%     | 13.6%     | 17.6%     | 8.1%    | 25.1%   |
| Anti-TNF $\alpha$ agents                           | 0.8%      | 9.1%      | 8.8%      | 13.3%     | 11.6%   | 4.0%    |
| Beta-blocking agents                               | 4.3%      | 18.8%     | 21.9%     | 15.1%     | 15.6%   | 35.4%   |
| Diuretics                                          | 2.1%      | 20.8%     | 26.8%     | 20.0%     | 20.2%   | 32.3%   |
| Drugs for obstructive airway diseases              | 75.9%     | 55.6%     | 63.3%     | 65.4%     | 69.5%   | 68.2%   |
| Drugs used in diabetes                             | 4.4%      | 14.8%     | 18.5%     | 13.1%     | 15.0%   | 15.9%   |
| Immunosuppressants                                 | 5.7%      | 22.6%     | 23.7%     | 28.1%     | 24.9%   | 22.1%   |
| Lipid-modifying agents                             | 11.6%     | 32.4%     | 36.9%     | 27.1%     | 23.2%   | 62.1%   |
| Opioids                                            | 14.6%     | 28.6%     | 30.1%     | 26.9%     | 42.7%   | 28.2%   |
| Phototherapy                                       | 1.6%      | 2.2%      | 2.2%      | 2.5%      | 1.0%    | 4.0%    |
| Psycholeptics                                      | 17.8%     | 31.3%     | 29.4%     | 31.8%     | 45.7%   | 30.8%   |
| Psychostimulants, agents used for ADHD, nootropics | 12.7%     | 3.4%      | 2.8%      | 5.0%      | 5.2%    | <2.6%   |
| Topical corticosteroids                            | 41.1%     | 38.9%     | 51.4%     | 57.2%     | 53.5%   | 64.3%   |

PPP=palmoplantar pustulosis; JMDC=Japan Medical Data Center; EHR=Optum<sup>®</sup> de-identified Electronic Health Record Database; SES=Optum's Clinformatics<sup>®</sup> de-identified Data Mart Database; CCAIE=IBM<sup>®</sup> MarketScan<sup>®</sup> Commercial Database; MDCD=IBM<sup>®</sup> MarketScan<sup>®</sup> Multi-State Medicaid Database; MDCR=IBM<sup>®</sup> MarketScan<sup>®</sup> Medicare Supplemental Database; ADHD=attention-deficit/hyperactivity disorder.

**Supplementary Information Table 7. PPP treatments after diagnosis in patients identified using the specific PPP definition<sup>a,b</sup>**

|                        | US        |         |           |         |           |         |         |         |         |         | Japan     |         |
|------------------------|-----------|---------|-----------|---------|-----------|---------|---------|---------|---------|---------|-----------|---------|
|                        | Optum EHR |         | Optum SES |         | CCAE      |         | MDCD    |         | MDCR    |         | JMDC      |         |
|                        | (n=1,848) |         | (n=1,563) |         | (n=1,838) |         | (n=578) |         | (n=195) |         | (n=6,376) |         |
|                        | 1-30d     | 31-365d | 1-30d     | 31-365d | 1-30d     | 31-365d | 1-30d   | 31-365d | 1-30d   | 31-365d | 1-30d     | 31-365d |
| Phototherapy           | 3.6%      | 6.0%    | 2.4%      | 4.8%    | 3.9%      | 6.7%    | 1.7%    | 5.4%    | 4.8%    | 8.7%    | 10.8%     | 14.1%   |
| Topical corticosteroid | 44.9%     | 49.4%   | 45.4%     | 53.8%   | 50.3%     | 61.3%   | 52.6%   | 59.8%   | 48.0%   | 65.1%   | 58.6%     | 61.8%   |
| Adalimumab             | 1.1%      | 6.3%    | 1.0%      | 4.3%    | 1.1%      | 6.4%    | <0.9%   | 9.7%    | –       | –       | –         | –       |
| Secukinumab            | 0.7%      | 3.1%    | <0.3%     | 2.7%    | 0.8%      | 3.7%    | <0.9%   | 3.1%    | –       | –       | –         | –       |
| Infliximab             | <0.3%     | 1.0%    | 0.8%      | 1.6%    | 0.7%      | 1.7%    | <0.9%   | 2.6%    | –       | –       | –         | –       |
| Ustekinumab            | 0.5%      | 2.0%    | 0.4%      | 2.6%    | 0.4%      | 3.4%    | <0.9%   | 2.3%    | –       | –       | –         | –       |
| Ixekizumab             | –         | –       | –         | –       | 0.4%      | 2.1%    | 1.4%    | 1.4%    | –       | –       | –         | –       |
| Risankizumab           | –         | –       | –         | –       | 0.4%      | 1.5%    | –       | –       | –       | –       | –         | –       |
| Guselkumab             | –         | –       | <0.3%     | 1.3%    | <0.3%     | 1.3%    | –       | –       | –       | –       | –         | –       |
| Denosumab              | <0.3%     | 1.2%    | 0.4%      | 1.4%    | –         | –       | –       | –       | –       | –       | –         | –       |
| Vedolizumab            | –         | –       | –         | –       | –         | –       | <0.9%   | 1.0%    | –       | –       | –         | –       |
| Acitretin              | 1.3%      | 5.6%    | 2.6%      | 4.8%    | 3.2%      | 5.6%    | 1.9%    | 4.5%    | <2.6%   | 7.2%    | –         | –       |
| Tretinoin              | <0.3%     | 1.1%    | –         | –       | <0.3%     | 1.0%    | –       | –       | –       | –       | –         | –       |
| Antimalarials          | 0.8%      | 2.1%    | 0.2%      | 1.3%    | 0.1%      | 1.3%    | 0.3%    | 1.9%    | 0.4%    | 0.8%    | –         | –       |
| Anti-TNF alpha agents  | 1.6%      | 12.1%   | 2.3%      | 8.7%    | 2.4%      | 12.3%   | 2.1%    | 16.1%   | 1.2%    | 6.1%    | –         | –       |

<sup>a</sup>Treatments are shown if they were administered to  $\geq 1\%$  of patients in any database between 31 and 365 days following diagnosis (the index date).

<sup>b</sup>Tofacitinib was administered to <1% of patients across all databases.

PPP=palmoplantar pustulosis; US=United States; JMDC=Japan Medical Data Center; EHR=Optum<sup>®</sup> de-identified Electronic Health Record Database; SES=Optum's Clinformatics<sup>®</sup> de-identified Data Mart Database; CCAE=IBM<sup>®</sup> MarketScan<sup>®</sup> Commercial Database; MDCD=IBM<sup>®</sup> MarketScan<sup>®</sup> Multi-State Medicaid Database; MDCR=IBM<sup>®</sup> MarketScan<sup>®</sup> Medicare Supplemental Database; d=days; TNF=tumor necrosis factor.

**Supplementary Information Fig. 1 Prevalence using the specific PPP definition in JMDC by age and sex**

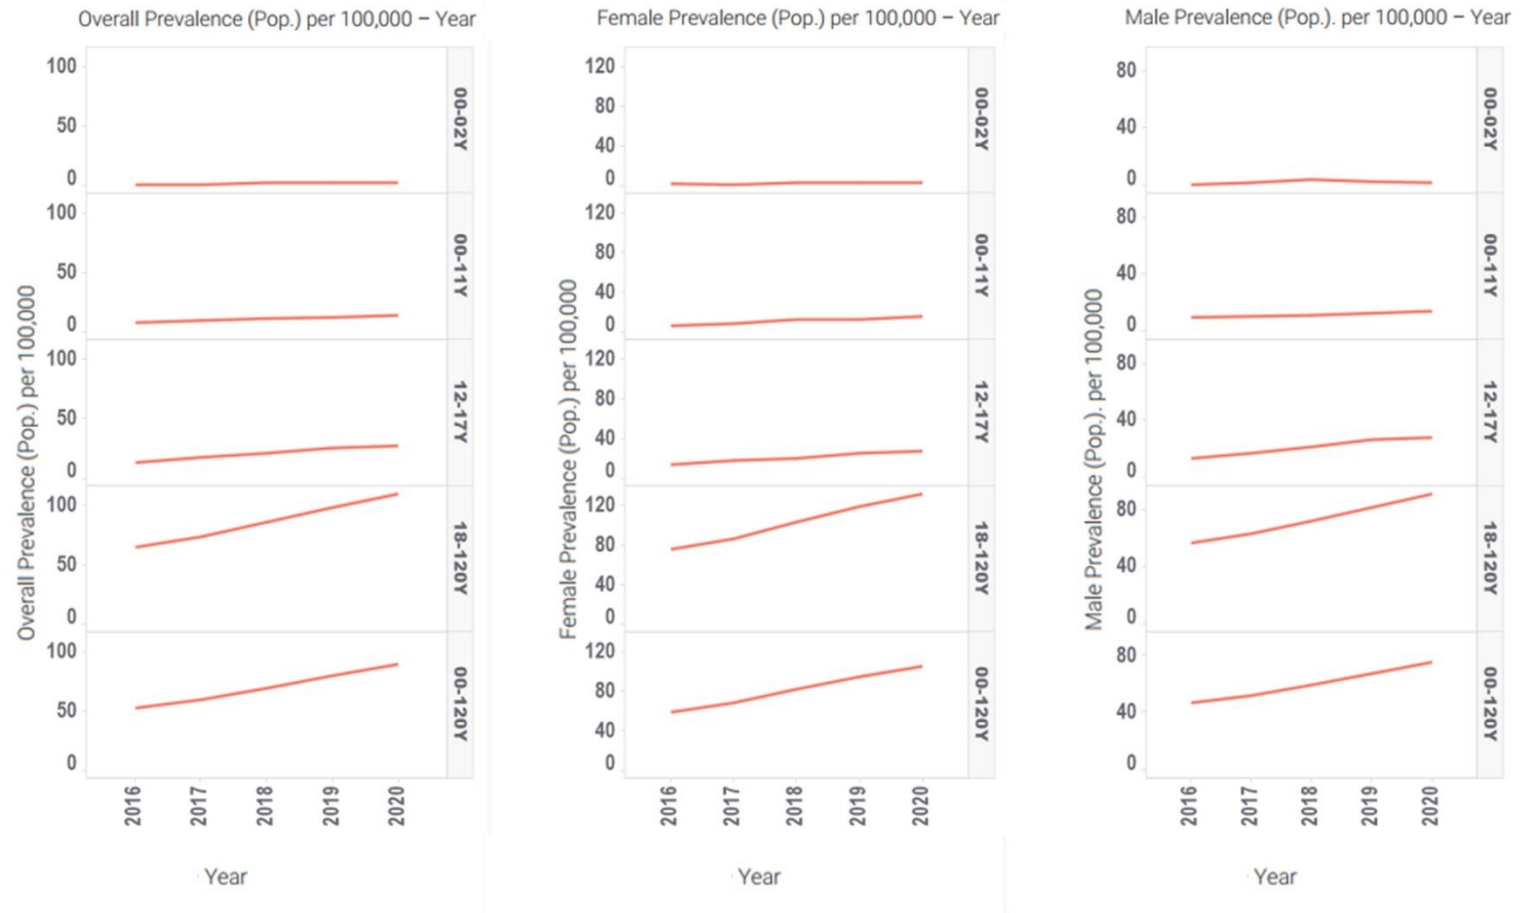

PPP=palmoplantar pustulosis; JMDC=Japan Medical Data Center.



**Supplementary Information Fig. 2 Incidence rates using the specific PPP definition by database, age, sex, and year**

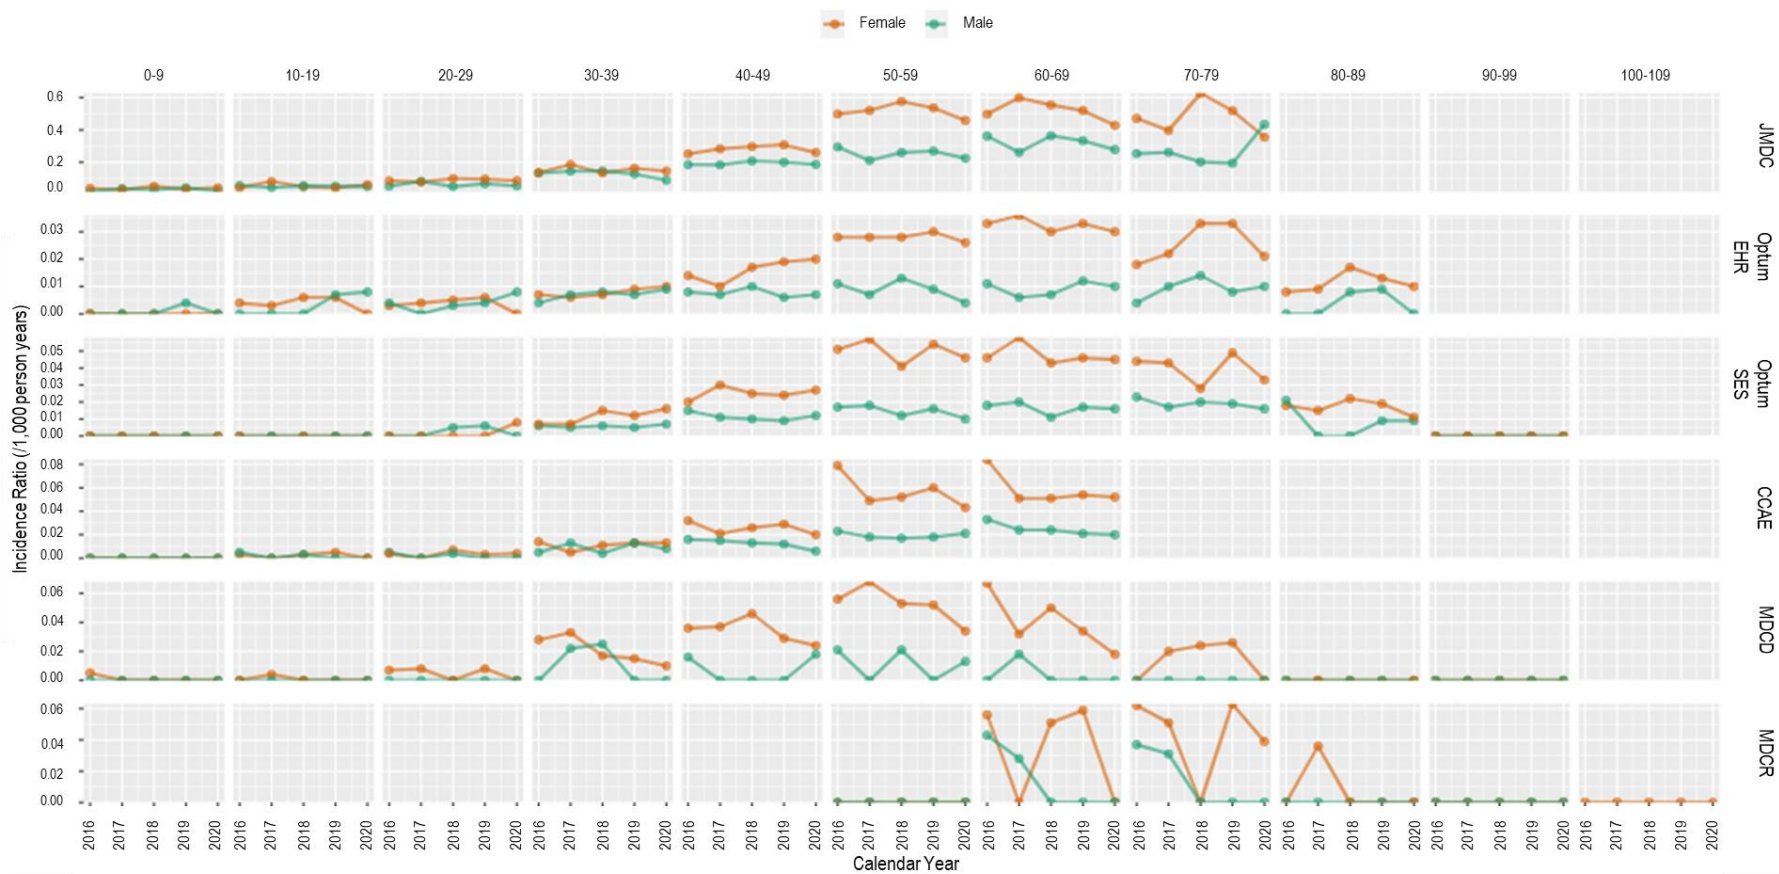

PPP=palmoplantar pustulosis; JMDC=Japan Medical Data Center; EHR=Optum® de-identified Electronic Health Record Database; SES=Optum’s Clinformatics® de-identified Data Mart Database; CCAE=IBM® MarketScan® Commercial Database; MDCCD=IBM® MarketScan® Multi-State Medicaid Database; MDCCR=IBM® MarketScan® Medicare Supplemental Database.
